# Supplementary material for: Maximizing spin Hall magnetoresistance in heavy metal/crystalline metallic ferromagnet multilayers with opposite spin Hall angles
Source: Royal Society of Chemistry journal article supplement (doi:10.1039/d2nr02306g), 2022-12-06
Supplement: d2nr02306g1.pdf [file d2nr02306g1.pdf]

## Supplementary Material

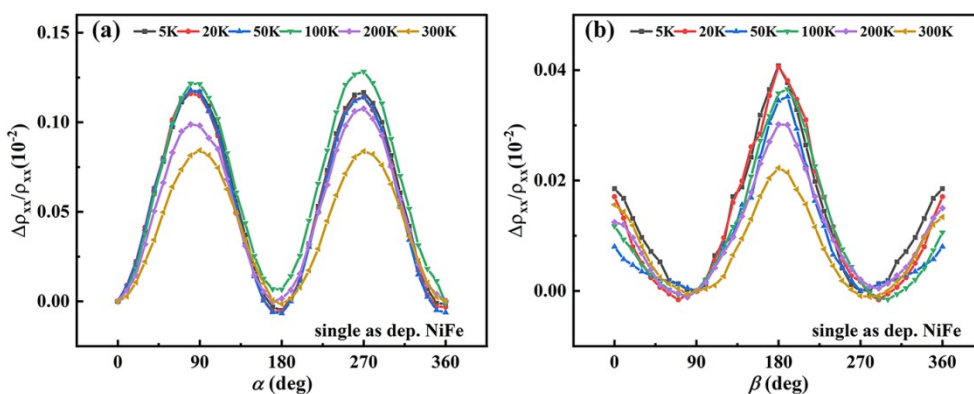

Fig. S1  $\Delta\rho_{xx}/\rho_{xx}$  measured in (a)  $\alpha$ , (b)  $\beta$  sweeps at different temperatures from 300K to 5K at a constant magnetic field of 2T for as dep.  $\text{Ni}_{80}\text{Fe}_{20}$  single-layer samples, respectively.

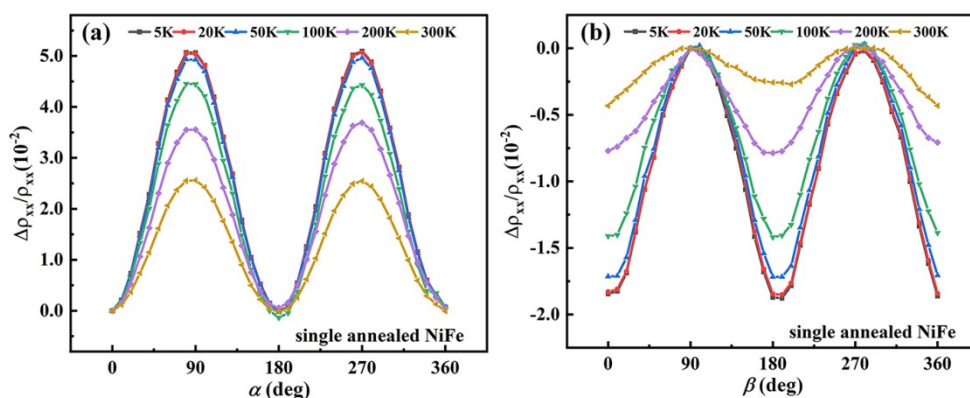

Fig. S2  $\Delta\rho_{xx}/\rho_{xx}$  measured in (a)  $\alpha$ , (b)  $\beta$  sweeps at different temperatures from 300K to 5K at a constant magnetic field of 2T for annealed  $\text{Ni}_{80}\text{Fe}_{20}$  single-layer samples, respectively.

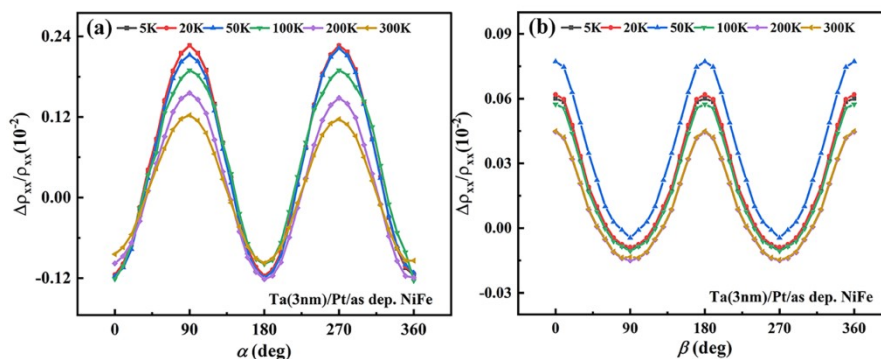

Fig. S3  $\Delta\rho_{xx}/\rho_{xx}$  measured in (a)  $\alpha$ , (b)  $\beta$  sweeps at different temperatures from 300K to 5K at a constant magnetic field of 2T for Ta (3nm)/Pt(3nm)/as dep.  $\text{Ni}_{80}\text{Fe}_{20}$  samples.
